# Supplementary material for: Meta-analysis of nanoparticle albumin-bound paclitaxel used as neoadjuvant chemotherapy for operable breast cancer based on individual patient data (JBCRG-S01 study)
Source: Breast Cancer. 2021 Apr 3;28(5):1023–37. doi: 10.1007/s12282-021-01238-9 (PMC8354972; doi:10.1007/s12282-021-01238-9)
Supplement: Supplementary file 1 — Supplementary file1 (XLSX 24 KB) [file 12282_2021_1238_MOESM1_ESM.xlsx]

## Sheet: SuppTable1. Character after NAC
Suppl. Table 1. Patient characteristics after NAC
Effect of NAC	cCR	183 (24.6%)
	PR	421 (56.5%)
	SD	100 (13.4%)
	PD	32 (4.2%)
	ND	9 (1.2%)
Surgery	Bt	373 (50.1%)
	Bp	369 (49.5%)
	Others	3 (0.4%)
Histopathological effect [21]	0	23 (3.1%)
	1a	190 (25.5%)
	1b	136 (18.3%)
	2a	112 (15.0%)
	2b	79 (10.6%)
	3	190 (25.5%)
	UK	15 (2.0%)
Total		745

## Sheet: Suppl Table2a,2b. Uni Multi  
Suppl. Table 2. ORs of clinical variables for pCR(ypT0 ypN0, ypT0/is ypN0)
a. ypT0 ypN0
Variables	Subgroup	Univariable logistic model				Multivariable logistic model
		OR	95% CI		P-value	OR	95% CI		P-value
Subtype	Luminal	reference
	HER2-rich	9.486	5.062	17.776	<0.001	8.76	4.34	17.68	<0.001
	Luminal/HER2	3.896	2.048	7.409	<0.001	3.69	1.84	7.38	<0.001
	Triple Negative	4.963	2.968	8.3	<0.001	3.48	2.02	6	<0.001
Menopause	post / pre	1.132	0.779	1.645	0.5163	-
Age	<40	reference				reference
	40-<60	1.309	0.73	2.347	0.366	1.81	0.95	3.45	0.072
	60-	1.05	0.549	2.008	0.8821	1.49	0.72	3.06	0.281
Nuclear Grade	1	reference				reference
	2	1.388	0.607	3.175	0.4371	1.13	0.48	2.66	0.78
	3	3.827	1.961	7.466	<0.001	1.85	0.92	3.72	0.086
Histological Grade	1	reference				-
	2	3.78	0.453	31.532	0.2192	-
	3	17.28	2.298	129.96	0.0056	-
Ki-67	40%≤ / <40%	4.426	2.628	7.455	<0.001	3.25	1.84	5.73	<0.001
cStage	I	reference				reference
	II	0.42	0.22	0.8	0.0083	0.46	0.22	0.95	0.036
	III	0.277	0.13	0.593	0.0009	0.31	0.13	0.73	0.007
Order of administering nab-PTX	After / Before A	0.294	0.767	2.186	0.3342	0.78	0.31	1.92	0.582
Sequence of administering nab-PTX	weekly / q3w	1.203	0.783	1.849	0.3982	2.01	0.96	4.2	0.065
Use of Trastuzumab		2.603	1.74	3.894	<0.001	-
Clinical evaluation of NAC	cCR	reference				-
	PR	0.082	0.052	0.129	<0.001	-
	SD	0.028	0.009	0.092	<0.001	-
	PD	<0.001	<0.001	>999.999	0.9737	-
b. ypT0/is ypNX
Variables	Subgroup	Univariable logistic model				Multivariable logistic model
		OR	95% CI		Pvalue	OR	95% CI		Pvalue
Subtype	Luminal	reference
	HER2-rich	14.315	7.999	25.619	<0.001	14.69	7.69	28.04	<0.001
	Luminal/HER2	4.813	2.89	8.014	<0.001	5.1	2.91	8.95	<0.001
	Triple Negative	3.084	2.037	4.67	<0.001	2.31	1.47	3.61	<0.001
Menopause	post / pre	1.117	0.812	1.536	0.4951	-
Age	<40	reference				reference
	40-<60	0.818	0.514	1.301	0.3956	0.98	0.58	1.67	0.955
	60-	0.808	0.484	1.351	0.4173	1.05	0.58	1.91	0.877
Nuclear Grade	1	reference				reference
	2	3.254	1.593	6.647	0.0012	2.04	0.97	4.27	0.059
	3	6.214	3.292	11.731	<0.001	2.81	1.43	5.54	0.003
Histological Grade	1	reference				-
	2	10.199	1.32	78.804	0.026	-
	3	28.88	3.869	215.554	0.001	-
Ki-67	40%≤ / <40%	3.11	2.072	4.668	<0.001	2.3	1.44	3.68	0.001
cStage	I	reference				reference
	II	0.719	0.384	1.346	0.303	0.93	0.46	1.9	0.852
	III	0.501	0.248	1.011	0.0536	0.55	0.25	1.22	0.143
Order of administering nab-PTX	After / Before A	1.27	0.805	2	0.3047	0.56	0.25	1.26	0.161
Sequence of administering nab-PTX	weekly / q3w	1.229	0.849	1.777	0.2741	2.55	1.29	5.02	0.007
Use of Trastuzumab		4.685	3.25	6.755	<0.001	-
Clinical evaluation of NAC	cCR	reference
	PR	0.07	0.046	0.106	<0.001	-
	SD	0.023	0.009	0.055	<0.001	-
	PD	0.011	0.002	0.086	<0.001	-

## Sheet: Suppl Table 3 Dose of nab-PTX
	Suppl Table 3. Total dose of nab-PTX (mg/body)
			mean (mg) ± SD
	All registered cases (n=753)		1060.6 ± 237.9
		q3w (n=575)	1004.3±116.7
					p<0.001
		Weekly (n=175)	1263.9 ± 358.0
	Nab-PTX →Anthracyclin (n=652)		1052.3 ± 209.4
		q3w (n=566)	1003.7 ± 117.5
					p<0.001
		Weekly (n=86)	1372.4 ± 353.0
	Anthracyclin→ Nab-PTX (n=96)		1114.0 ± 369.8
		q3w (n=9)	1040
					p=0.2875
		Weekly (n=87)	1159.0 ± 332.3
		q3w; Every 3 weeks	SD: Standard division
